# Supplementary material
Source: HighWire-hosted journal article supplement (http://www.ghspjournal.org/highwire/filestream/1576/field_highwire_adjunct_files/3/14-00156-Cooper-Supplementary_material-poster.pdf)
Supplement: 14-00156-Cooper-Supplementary_material-poster.pdf [file 14-00156-Cooper-Supplementary_material-poster.pdf]

# Family Planning Is Good for Baby Ma!

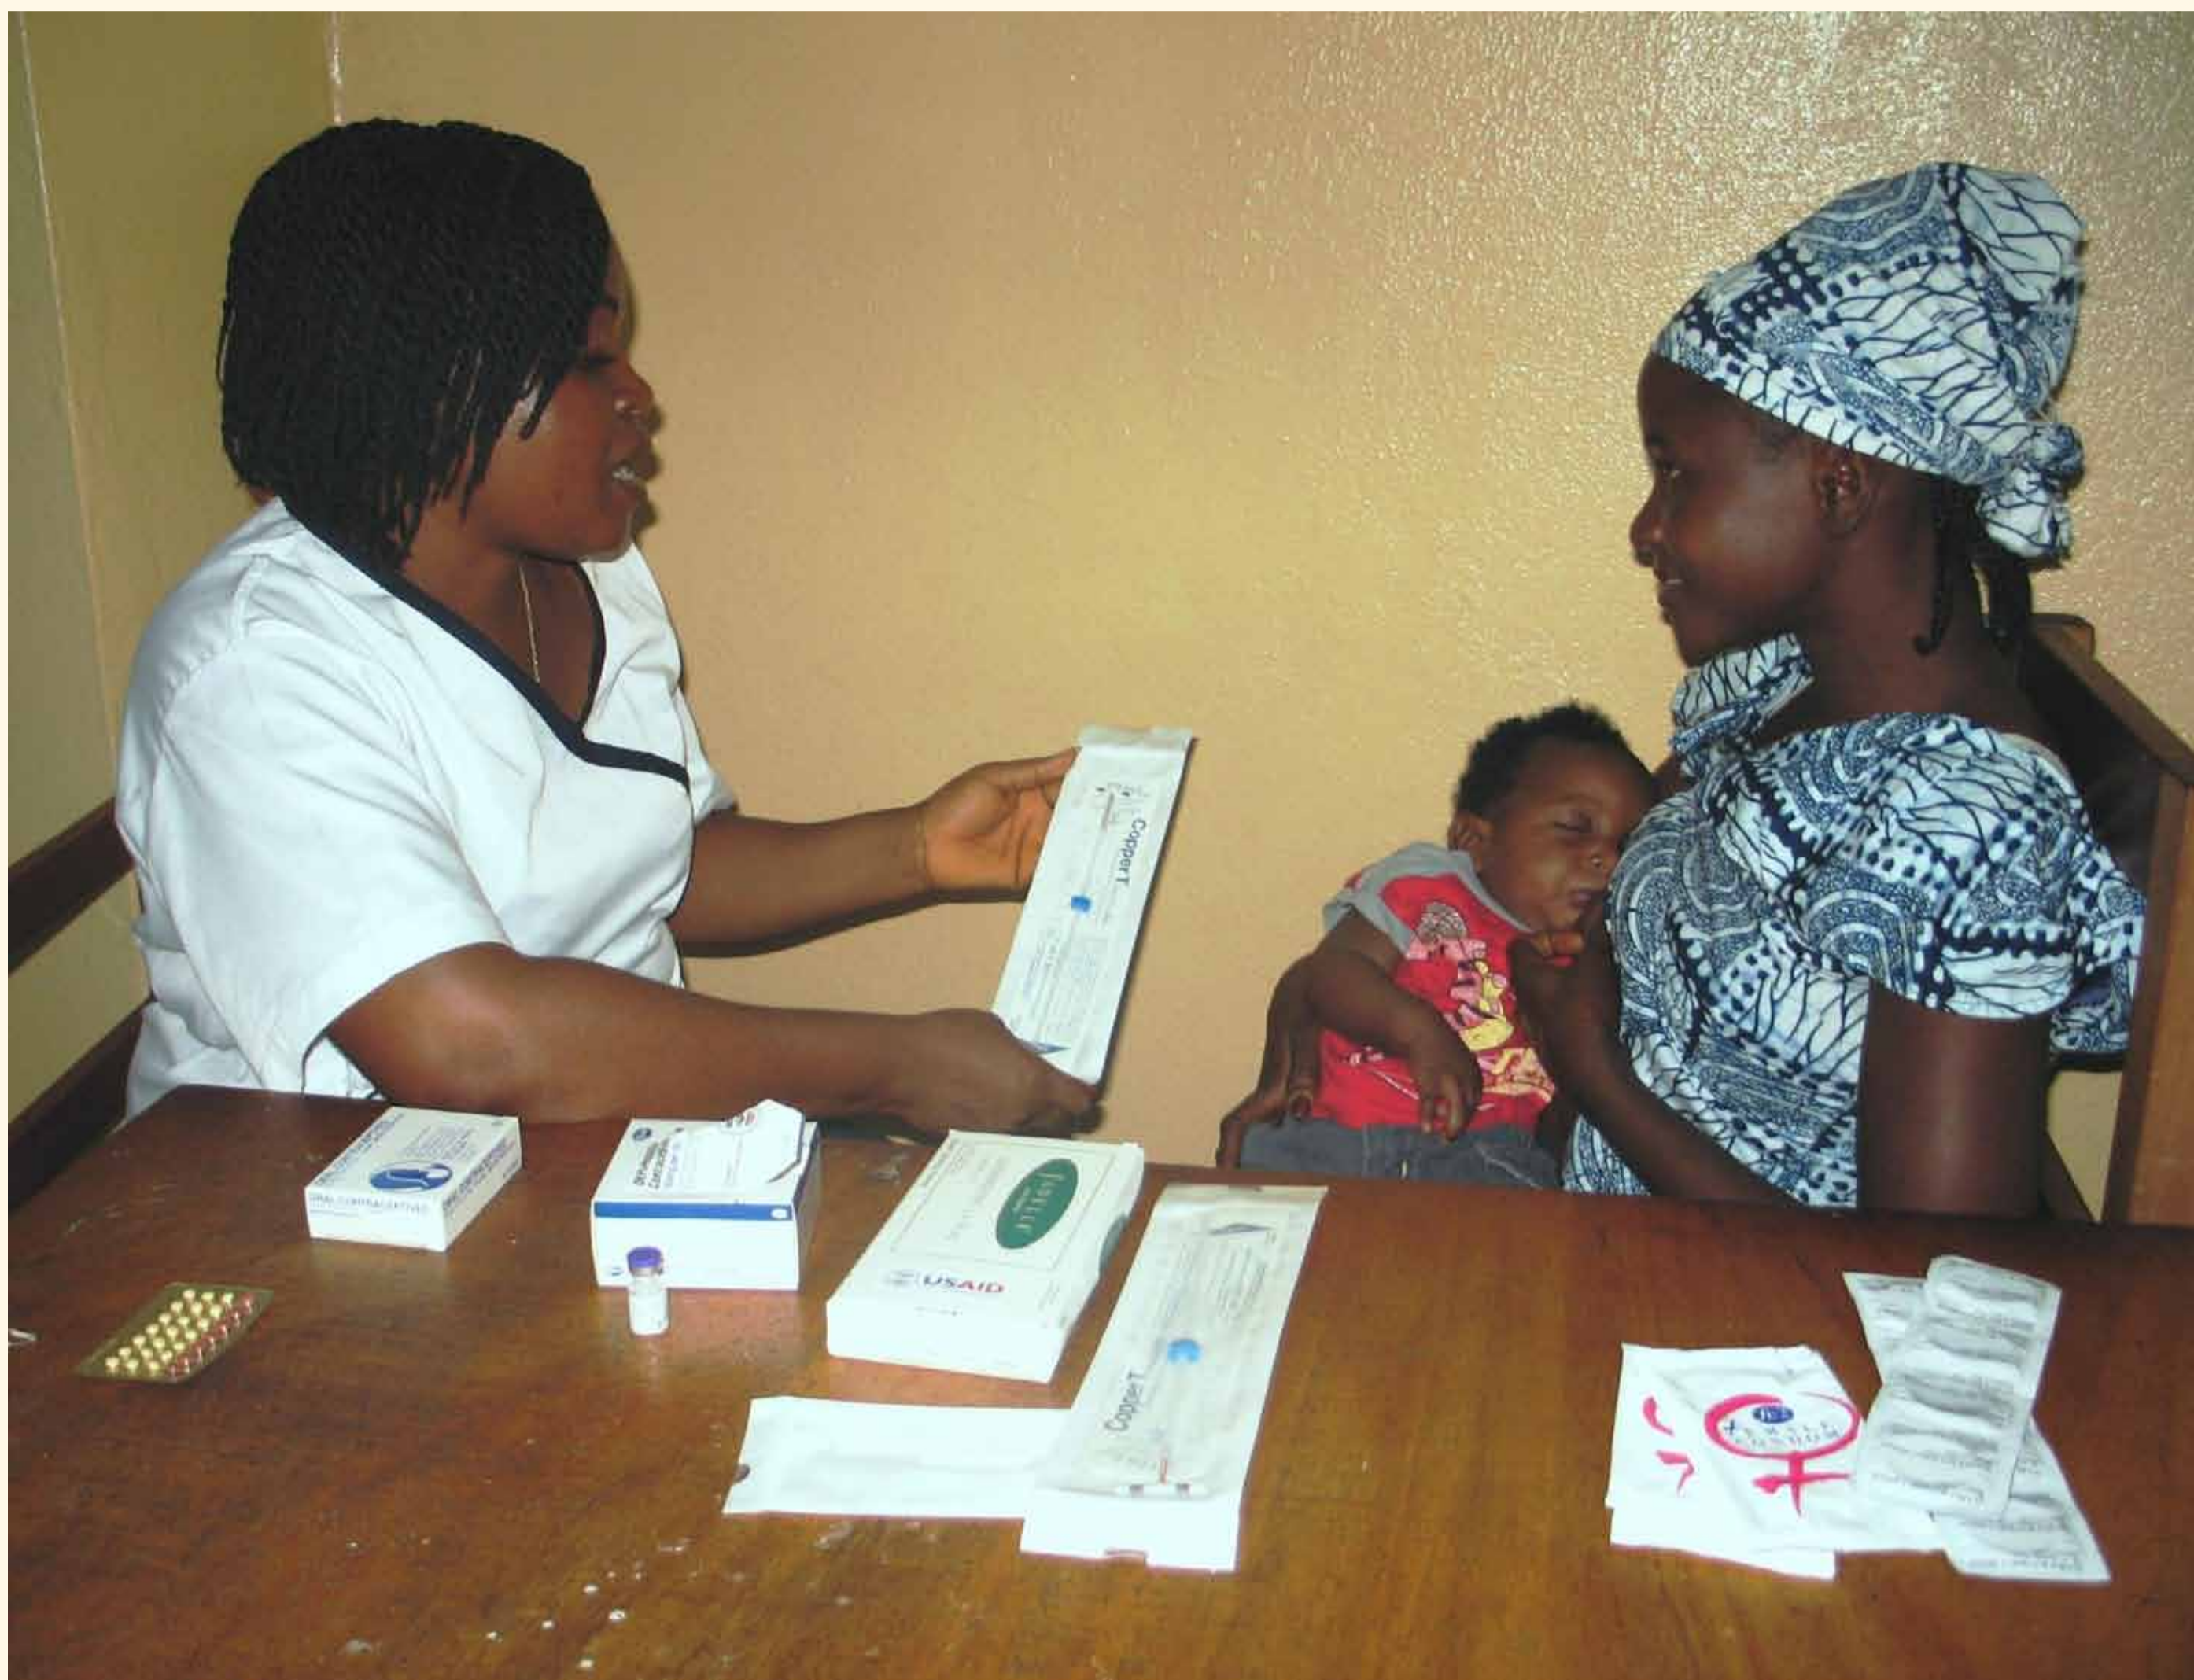

**Go to the family planning  
room today.**

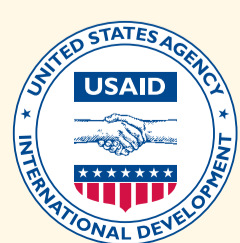

**USAID**  
FROM THE AMERICAN PEOPLE

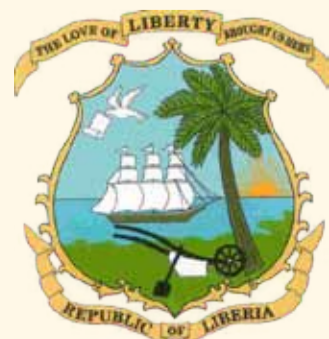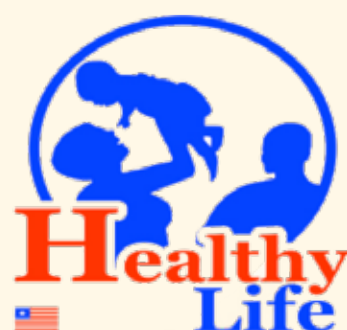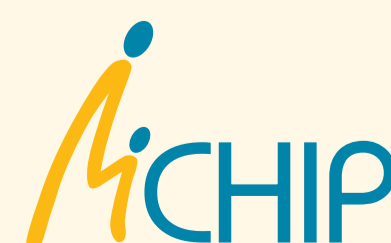

Maternal and Child Health  
Integrated Program
